# Supplementary material
Source: MDPI journal article supplement (https://www.mdpi.com/1996-1073/8/9/9266)
Supplement: s1 [file s1]

# Supplementary Materials

**Table S1.** Land classification in Ontario.

| Classification | Descriptions                                                                                                                            |
|----------------|-----------------------------------------------------------------------------------------------------------------------------------------|
| Class 1        | Well developed and has no significant limitations in use for crops.                                                                     |
| Class 2        | Has moderate limitations that restrict the range of crops or requires moderate conservation practices.                                  |
| Class 3        | Has moderately severe limitations that restrict the range of crops or requires special conservation practices.                          |
| Class 4        | Has severe limitations that restrict the choices of crops or requires special conservation and management practices, or both.           |
| Class 5        | Has very severe limitations that restrict their capability in producing perennial forage crops, and improvement practices are feasible. |
| Class 6        | Unsuitable for cultivation, and can be used for unimproved permanent pasture.                                                           |
| Class 7        | Has no capacity of arable culture or permanent pasture.                                                                                 |

**Table S2.** Land area under different tillable land classes and various regions in Ontario, ha.

| Regions          | Land class and tillable land area, Ha * |         |         |         |         | ^ Regional |
|------------------|-----------------------------------------|---------|---------|---------|---------|------------|
|                  | Class 1                                 | Class 2 | Class 3 | Class 4 | Class 5 | Area, Ha   |
| Southern Ontario | 238,102                                 | 876,664 | 414,109 | 37,138  | 39,332  | 13,993,100 |
| Western Ontario  | 724,831                                 | 254,067 | 239,130 | 73,112  | 130,091 | 56,311,787 |
| Central Ontario  | 165,830                                 | 113,526 | 122,839 | 118,976 | 84,424  | 3,981,400  |
| Eastern Ontario  | 32,005                                  | 312,567 | 304,841 | 148,471 | 65,166  | 3,529,600  |

\* Kludze *et al.*, [17]; ^ Wikipedia, 2014 [55].

**Table S3.** Summary of parameters for which data are collected from literature.

| Parameters/systems                                                    | Actual data       | Sources    |
|-----------------------------------------------------------------------|-------------------|------------|
| Miscanthus cultivation (kg CO <sub>2</sub> e/tDM)                     | −88.77 to −167.67 | [31]       |
| Feedstock cost (\$/tDM)                                               | 62.63 to 71.50    | [17]       |
| * Crushing (size 3 mm) (kWh/kg)                                       | 0.06095           | [22,23]    |
| Ethanol processing plant construction                                 | \$38 million      | [56]       |
| No. of labor (persons)                                                | 23                | [56]       |
| Enzyme:                                                               |                   |            |
| Energy consumption kWh/L                                              | 0.802             | [57]       |
| Material cost (\$/L)                                                  | 0.014             | [57]       |
| Yeast (\$/gallon)                                                     | 0.01              | [50]       |
| Vacuum extractive fermentation & distillation (MJ/kg hydrous ethanol) | 7.525             | [42]       |
| Purification (MJ/kg ethanol)                                          | 1.085             | [58]       |
| Ethanol yield (L/kg-dry miscanthus)                                   | 0.305             | [39,44–46] |

Note: Plant capacity is 20000 kL/year; labor cost \$46,000/person/year; \* assumed to be same that of straw; boiler efficiency 80% [59]; \$: Canadian dollar.

SI-4 Estimation methods of transportation distance [60].

Radius of the area:

$$R \text{ km} = (F/(\pi f_a f_{lc} Y))^{1/2} \quad (\text{S1})$$

where:

$F$  = Annual feedstock demand

$\pi$  = constant

$f_a$  = fraction of total farmland from which feedstock can be collected or produced

$f_{lc}$  = fraction of surrounding farmland containing crops

$Y$  = biomass yield per unit area (dry), t/km<sup>2</sup>

Transportation distance (collection center–processing plant):

$$D \text{ km} = 2Rf_w/3 \quad (\text{S2})$$

where  $f_w$  = road winding factor (assumed to be 1.3; [61]).
